# Supplementary material for: Evaluation of Porous (Poly(lactide-co-glycolide)-co-(ε-caprolactone)) Polyurethane for Use in Orthopedic Scaffolds
Source: MDPI journal article supplement (doi:10.3390/molecules29040766), 2024-02-07
Supplement: s1 [file s1]

## Supplementary material

# Evaluation of porous (poly(lactide-*co*-glycolide)-*co*-( $\epsilon$ -caprolactone)) polyurethane for use in orthopedic scaffolds

Gaëlle Savin <sup>1,2,3</sup>, Océane Sastourne-Array <sup>2</sup>, Sylvain Caillol <sup>1\*</sup>, Audrey Bethry <sup>2</sup>, Michel Assor <sup>3</sup>, Ghislain David <sup>1</sup>, Benjamin Nottelet <sup>2,4\*</sup>

<sup>1</sup> ICGM, Univ Montpellier, CNRS, ENSCM, Montpellier, France gaelle.savin@enscm.fr (G.S.); oceane.sastourne-arrey@etu.umontpellier.fr (O.S-A.); ghislain.david@enscm.fr (G.D.)

<sup>2</sup> Polymers for Health and Biomaterials, IBMM, Univ Montpellier, CNRS, ENSCM, Montpellier, France

<sup>3</sup> Arthrocart Biotech, Marseille, France

<sup>4</sup> Department of Pharmacy, Nîmes University Hospital, Univ Montpellier, 30900, Nîmes, France

\* Correspondence: [sylvain.caillol@enscm.fr](mailto:sylvain.caillol@enscm.fr) (S.C.); benjamin.nottelet@umontpellier.fr (BJ)

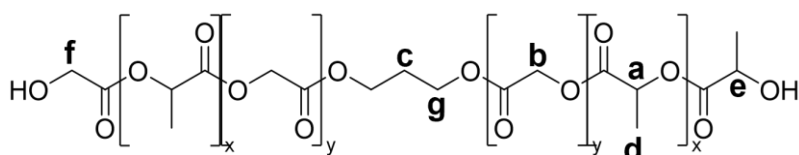

**Figure S1.** Idealized PLGA structure.

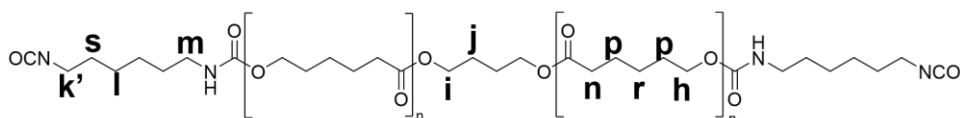

**Figure S2.** Idealized prepolymer PCL di-NCO structure.

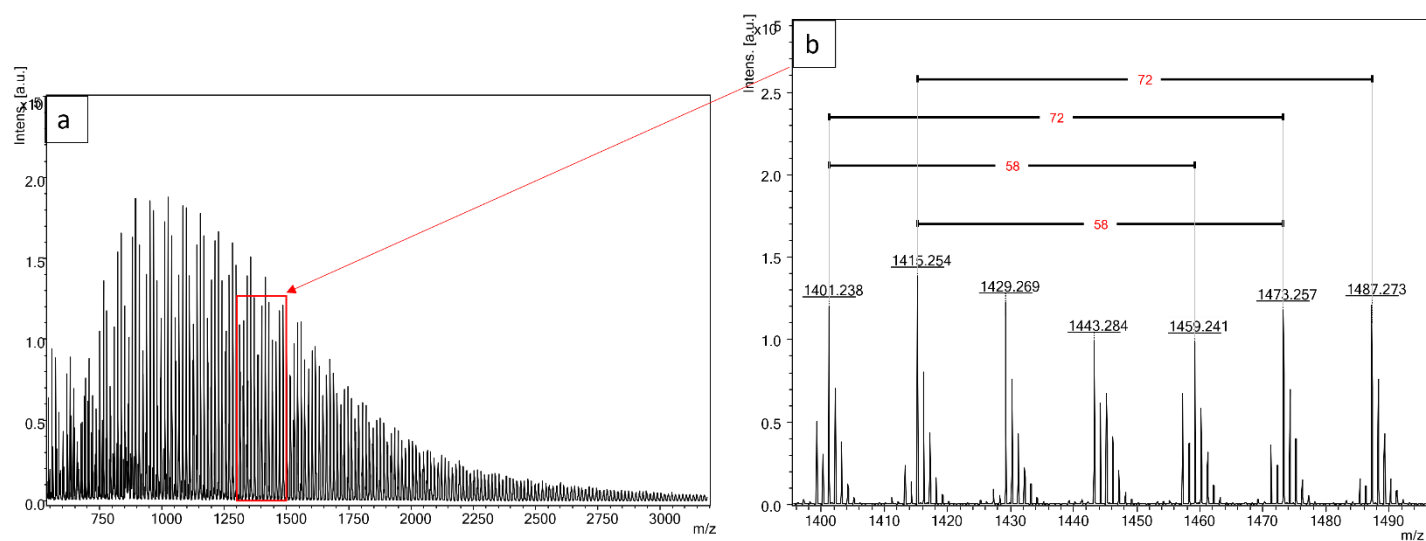

**Figure S3.** MALDI-TOF of PLGA 50:50 with a) the scale from 600 to 300 m/z and b) a zoom in from 1400 to 1500 m/z.

**Table S1.** dn/dc values obtained for the polymers

|              | PLGA 50           | Prepolymer        | PEU               |
|--------------|-------------------|-------------------|-------------------|
| dn/dc (ml/g) | $0.044 \pm 0.003$ | $0.079 \pm 0.003$ | $0.069 \pm 0.004$ |
| $R^2$        | 0.9894            | 0.9957            | 0.9957            |

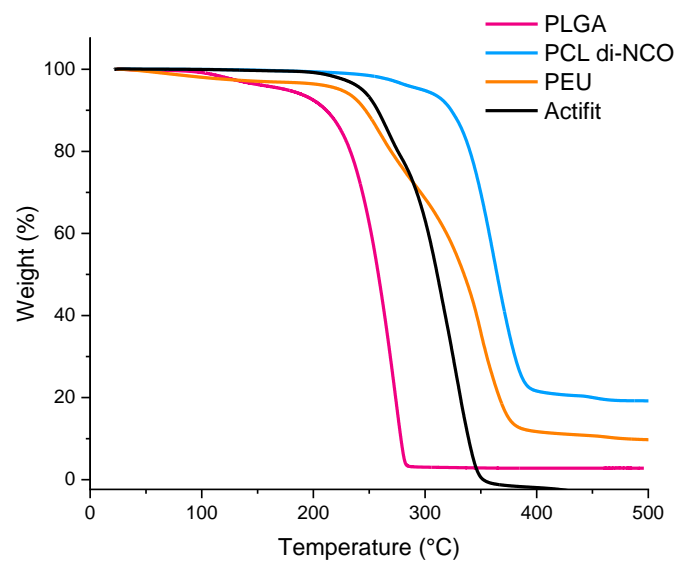

**Figure S4.** Thermogravimetric analysis of the polymers.

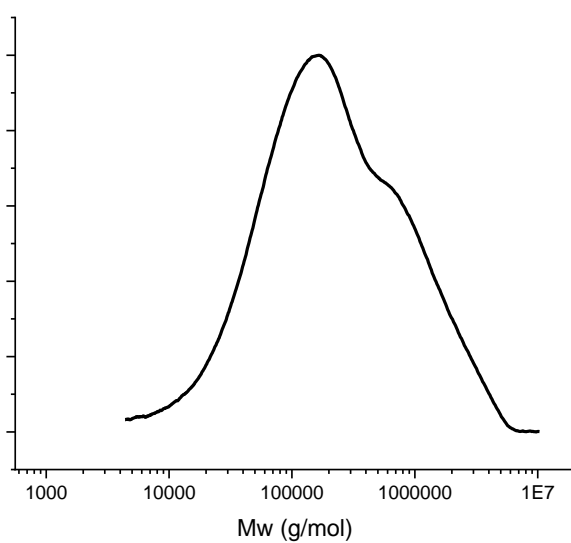

**Figure S5.** Chromatogram of Actifit<sup>®</sup> (SEC MALS-THF).

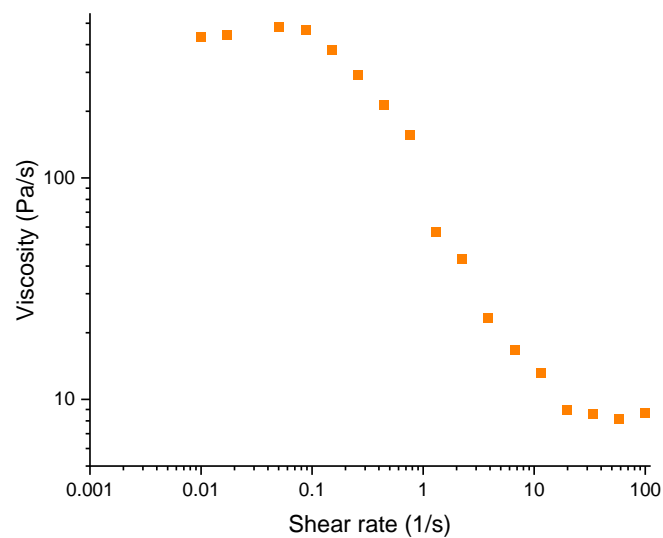

**Figure S6.** Viscosity curve of the PEU in solution in dioxane.

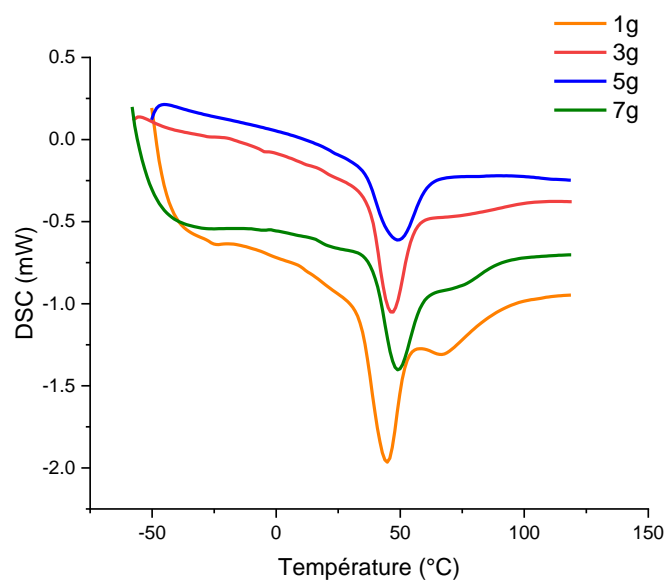

**Figure S7.** Differential scanning calorimetry thermograms of the foams prepared with different amount of porogen agent (g salt/g polymer).

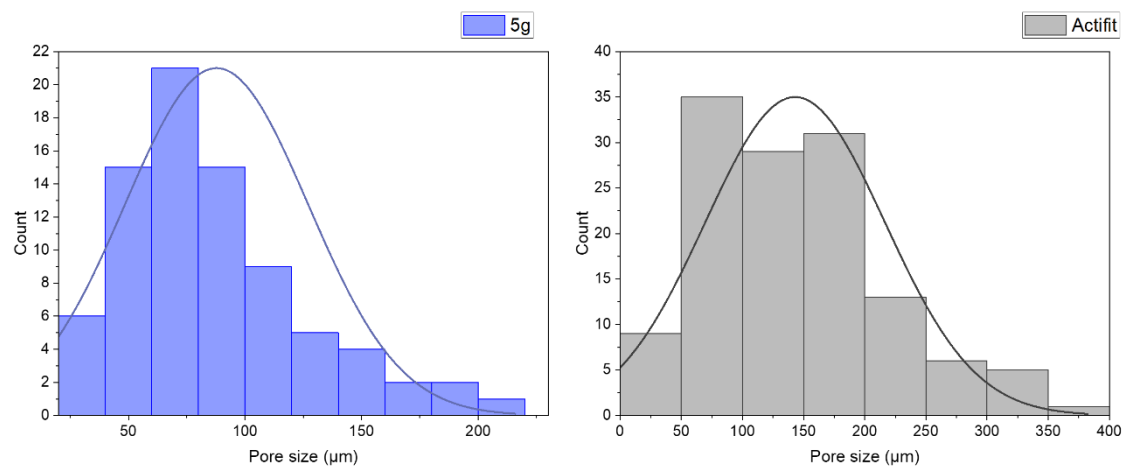

**Figure S8.** Pore size repartition of foam with 5g of salt/g PEU and Actifit®.
